# Supplementary material for: Design and synthesis of bile acid derivatives and their activity against colon cancer
Source: Royal Society of Chemistry journal article supplement (doi:10.1039/d2md00220e), 2022-01-01

## Supporting Information

### $^1\text{H}$ NMR and $^{13}\text{C}$ NMR:

#### Compound 1

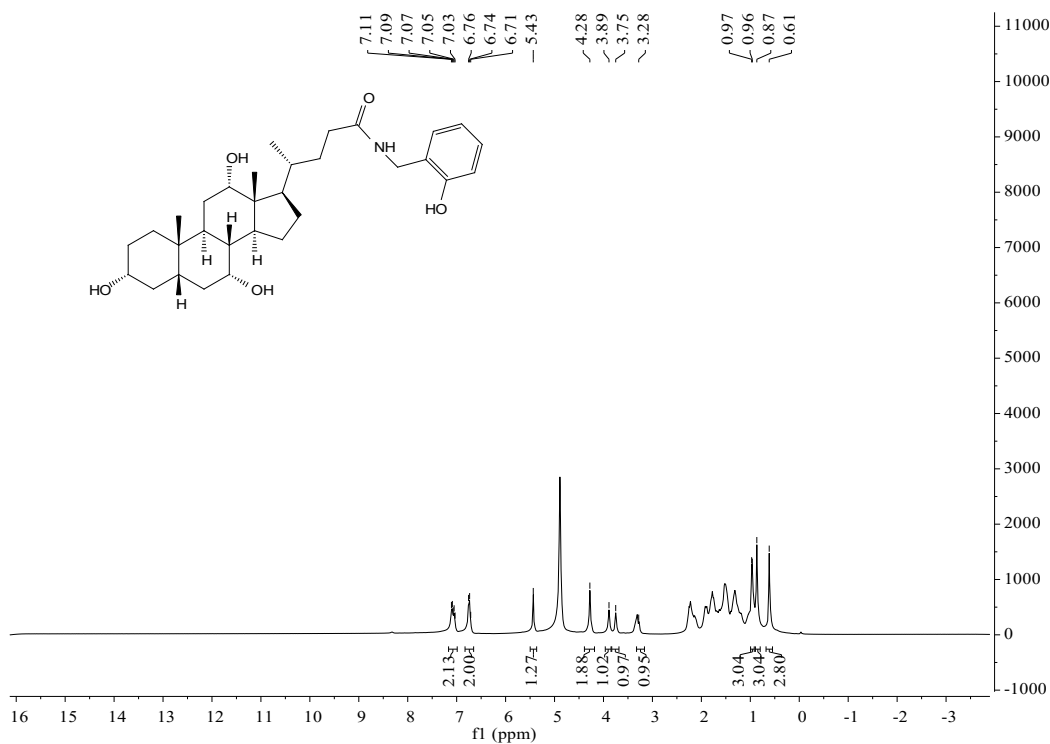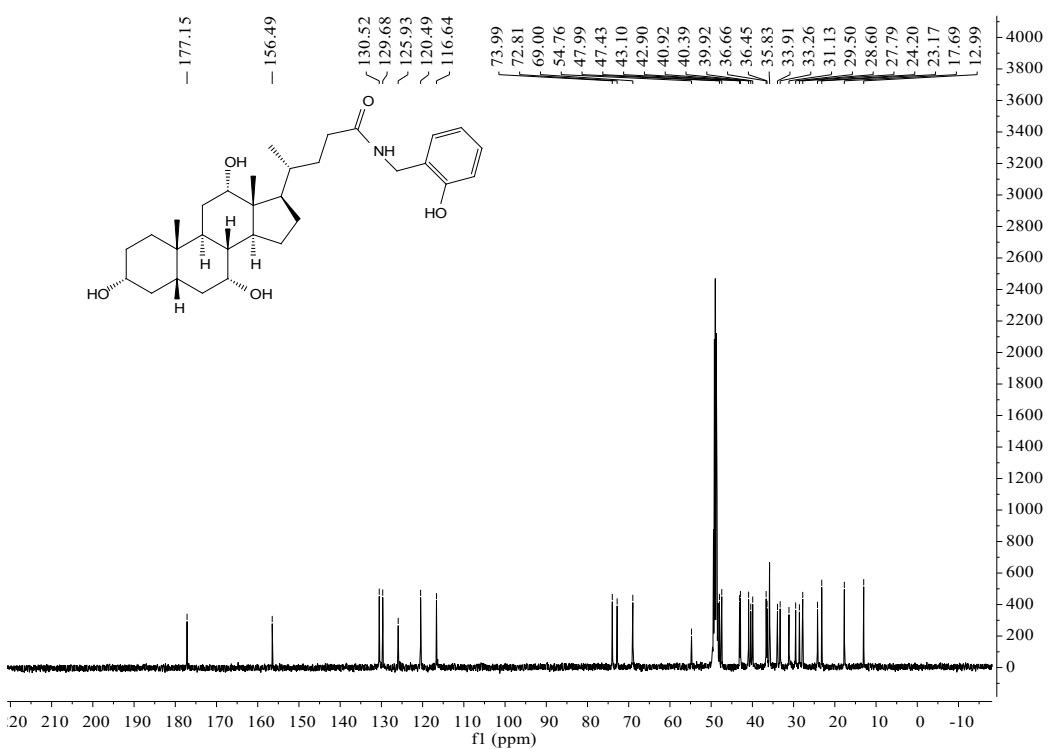

# Compound 2

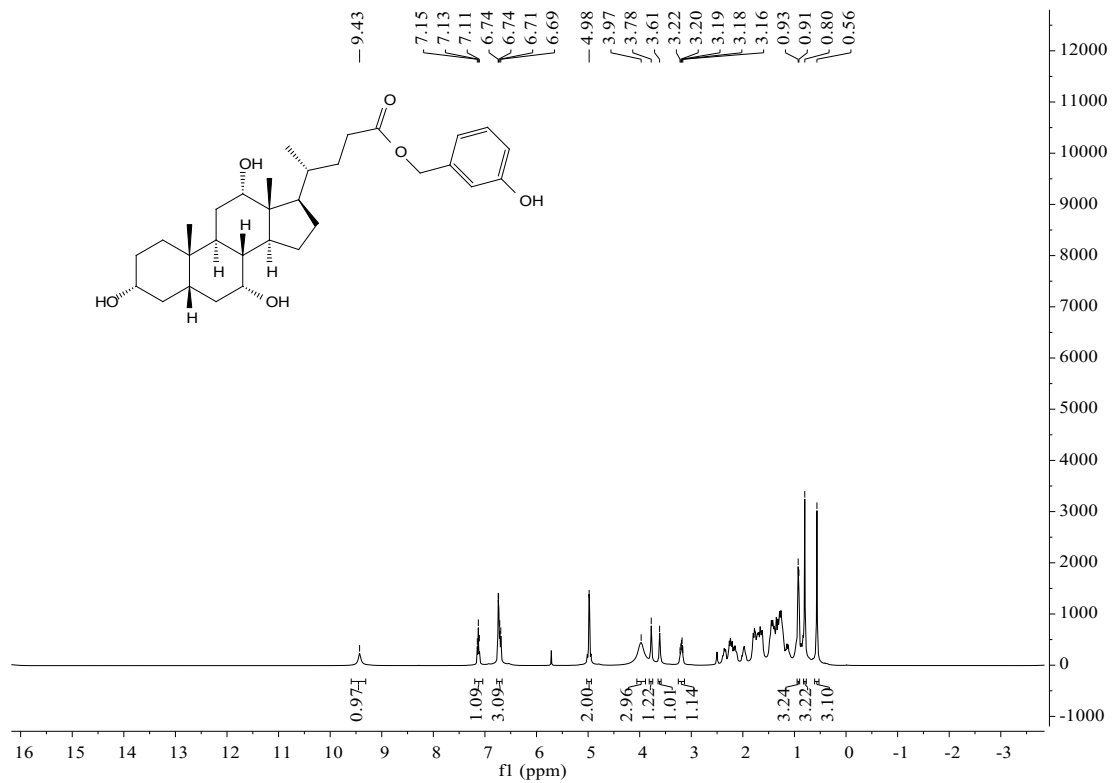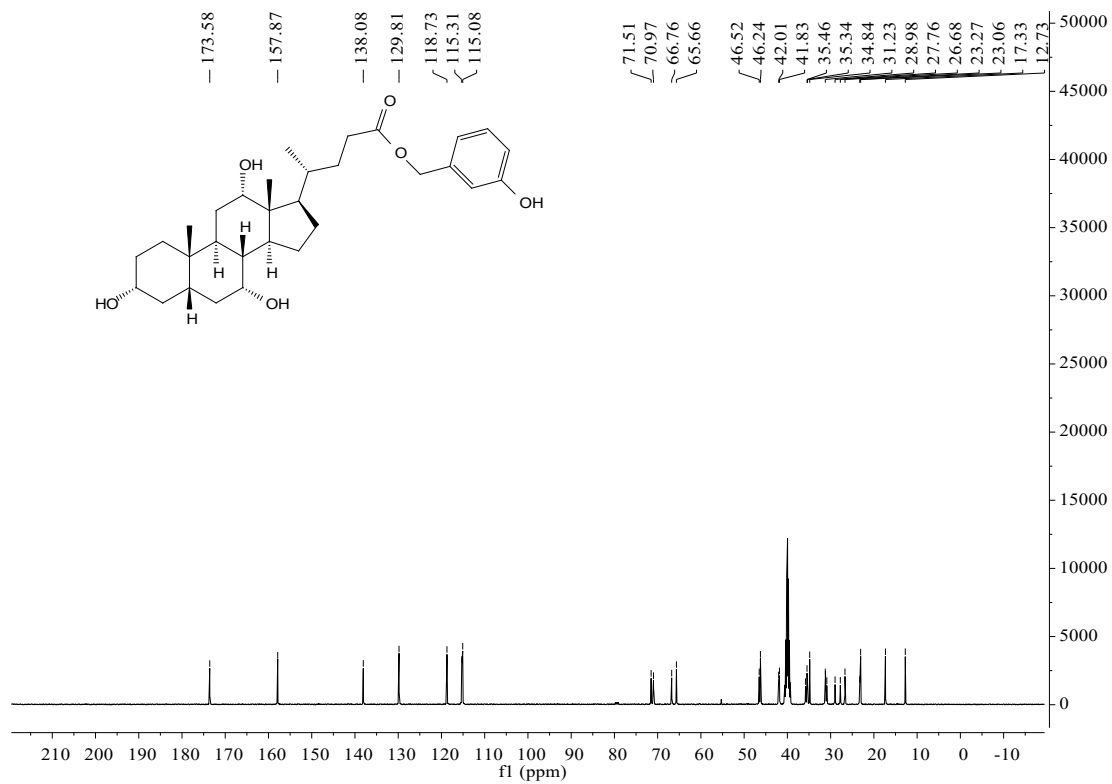

# Compound 3

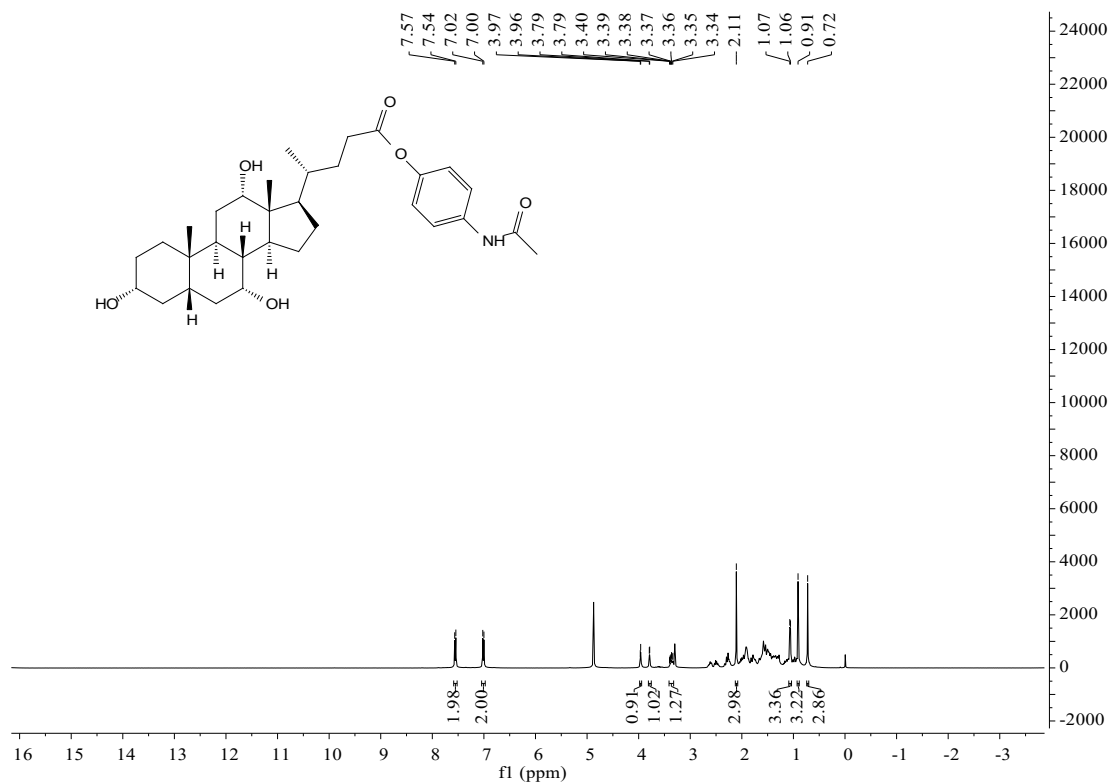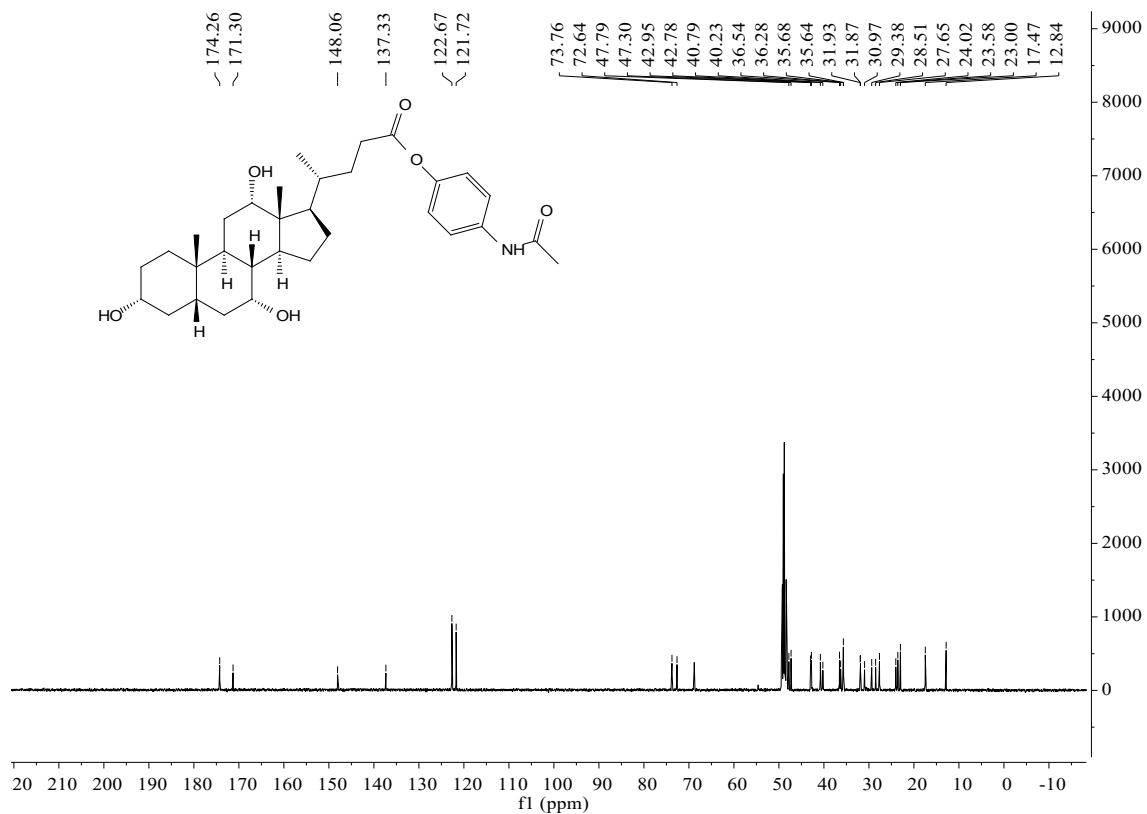

# Compound 4

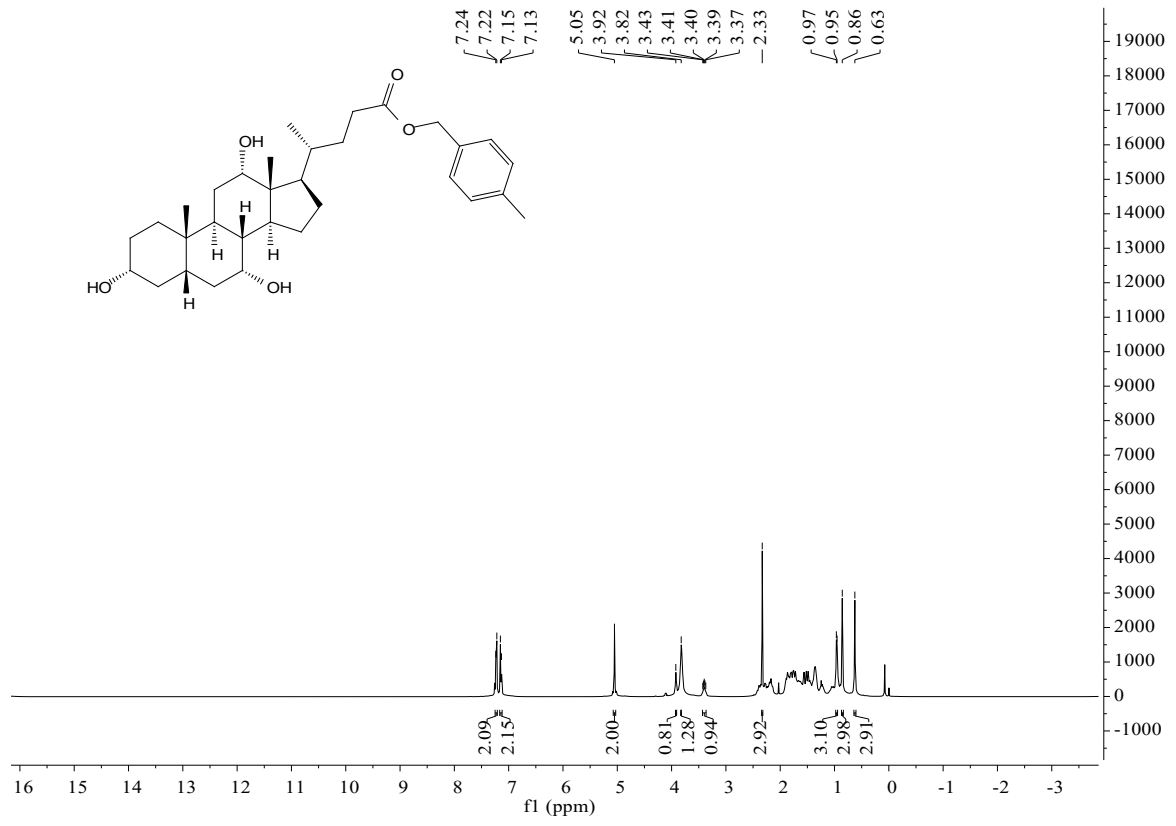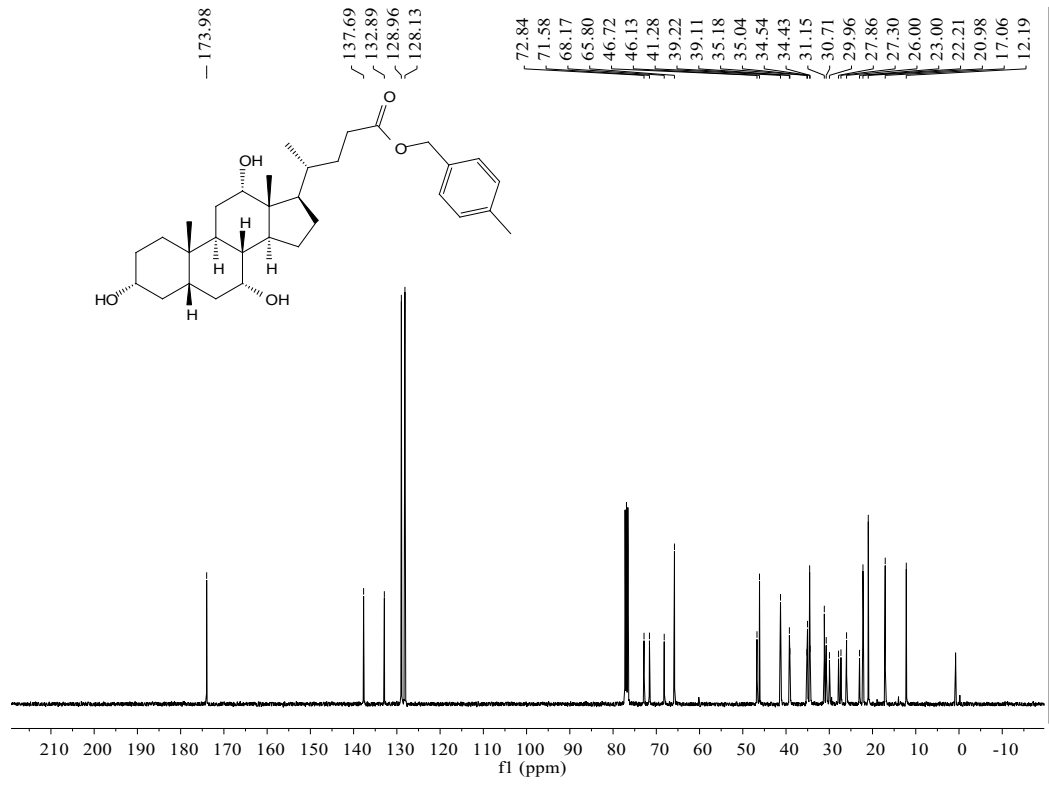

# Compound 5

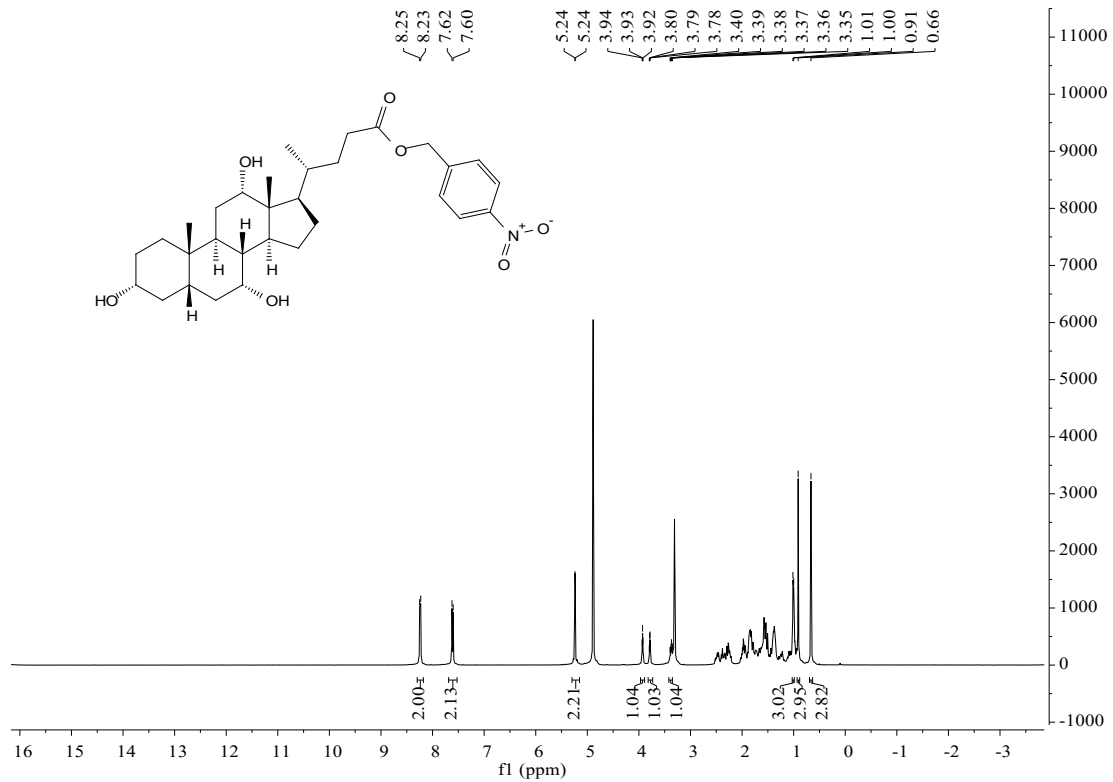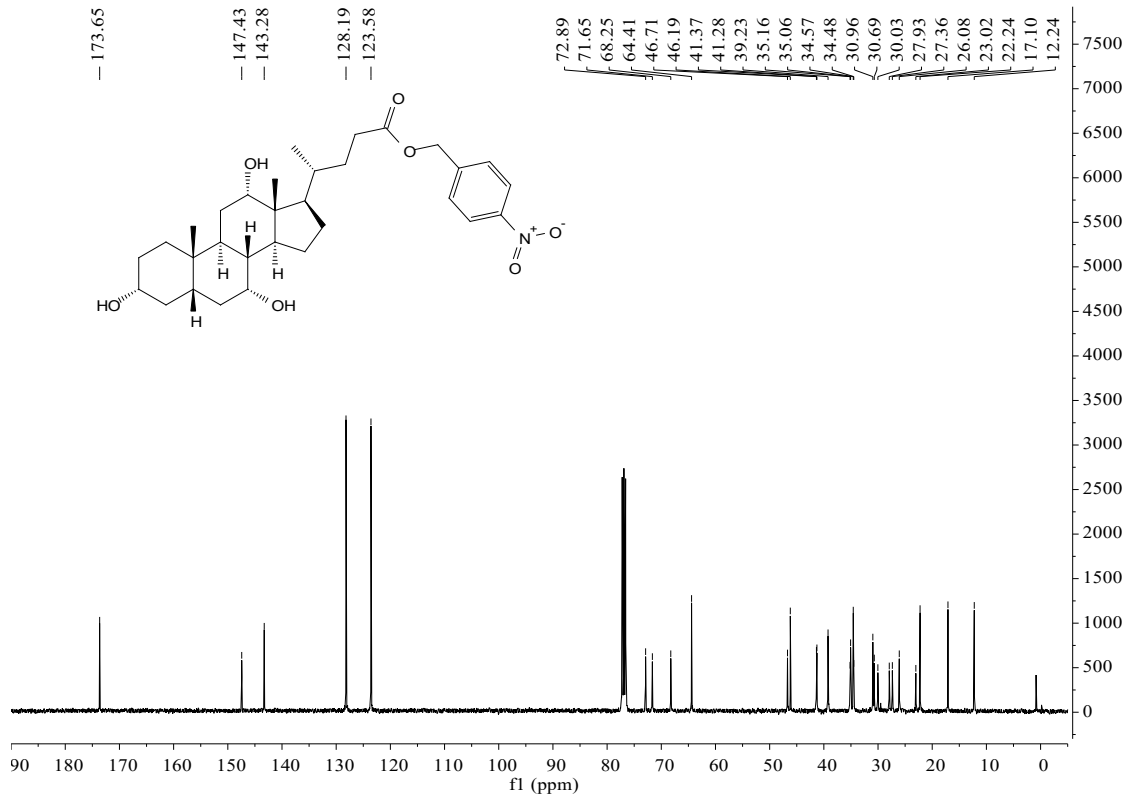

# Compound 6

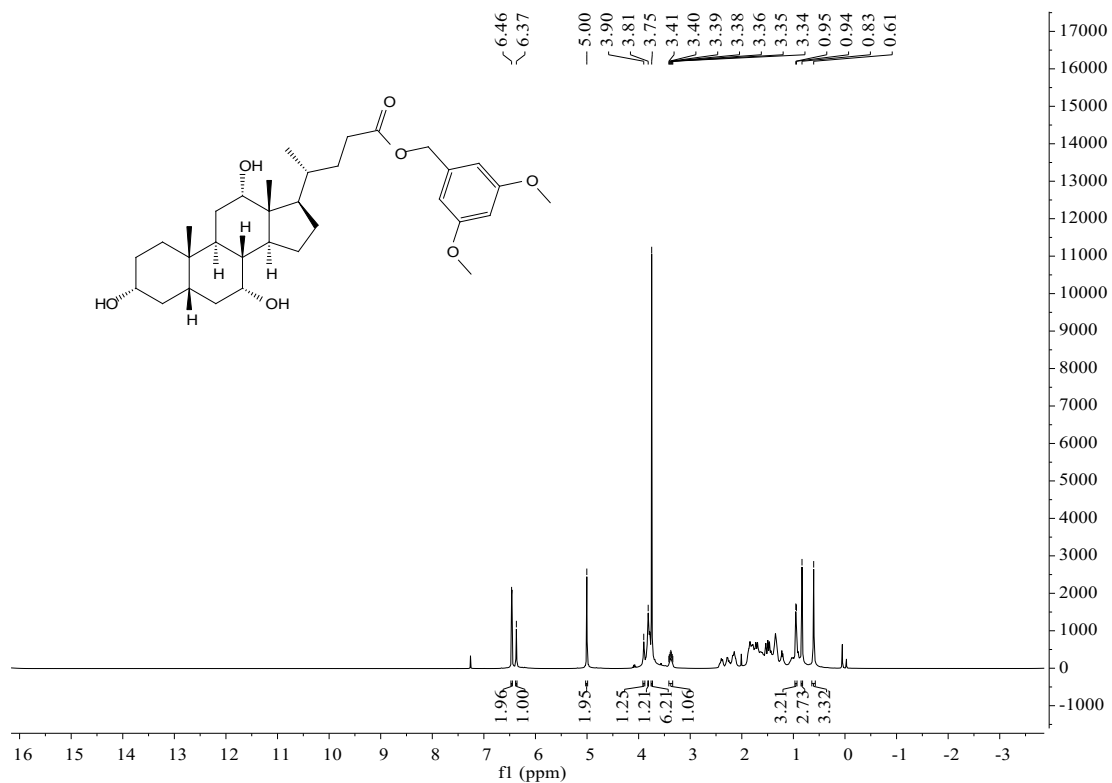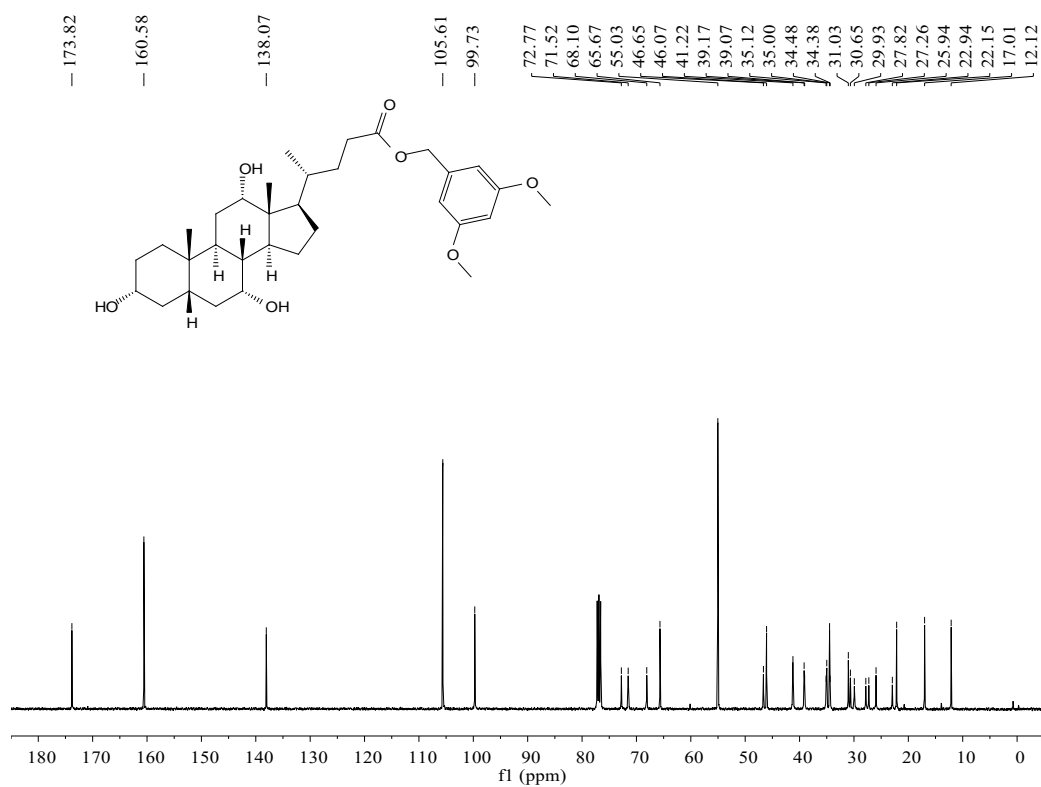

# Compound 7

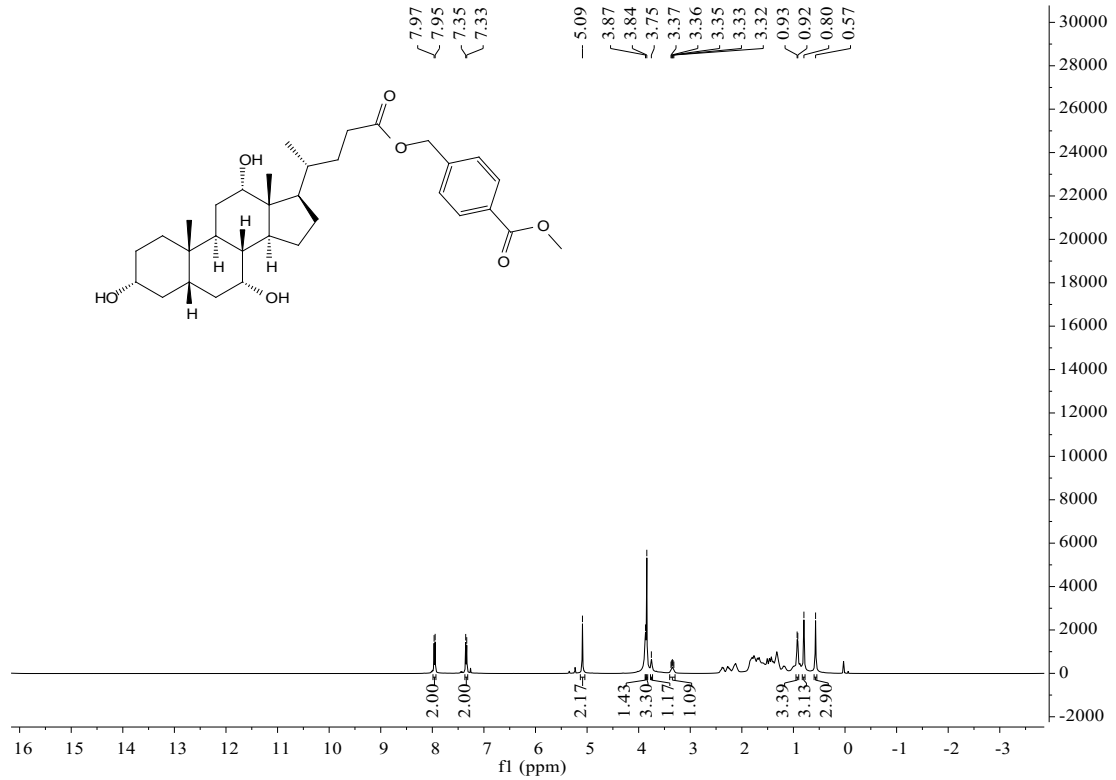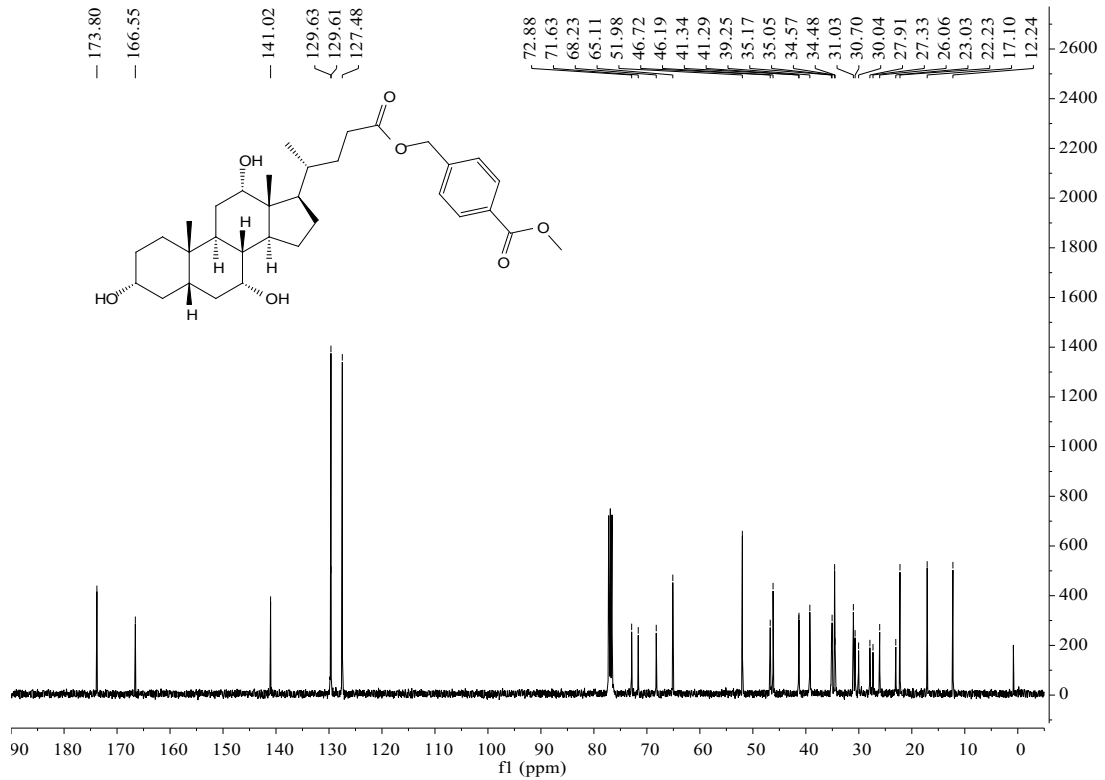

# Compound 8

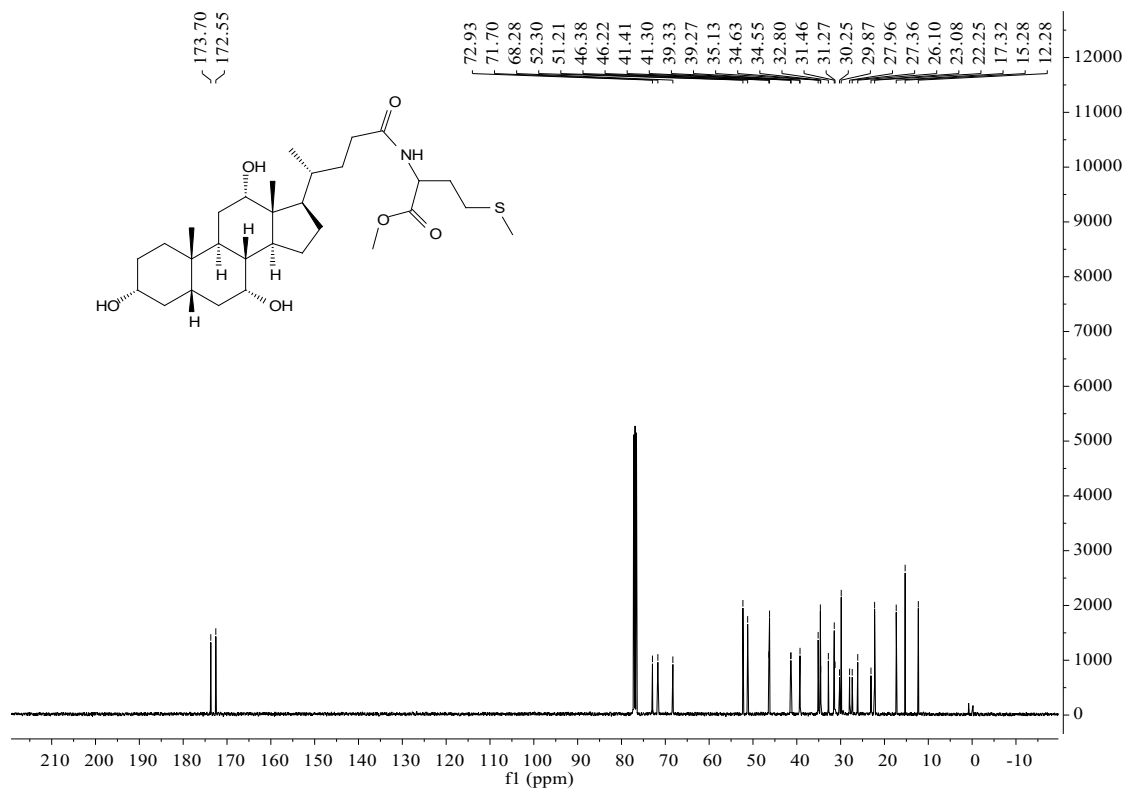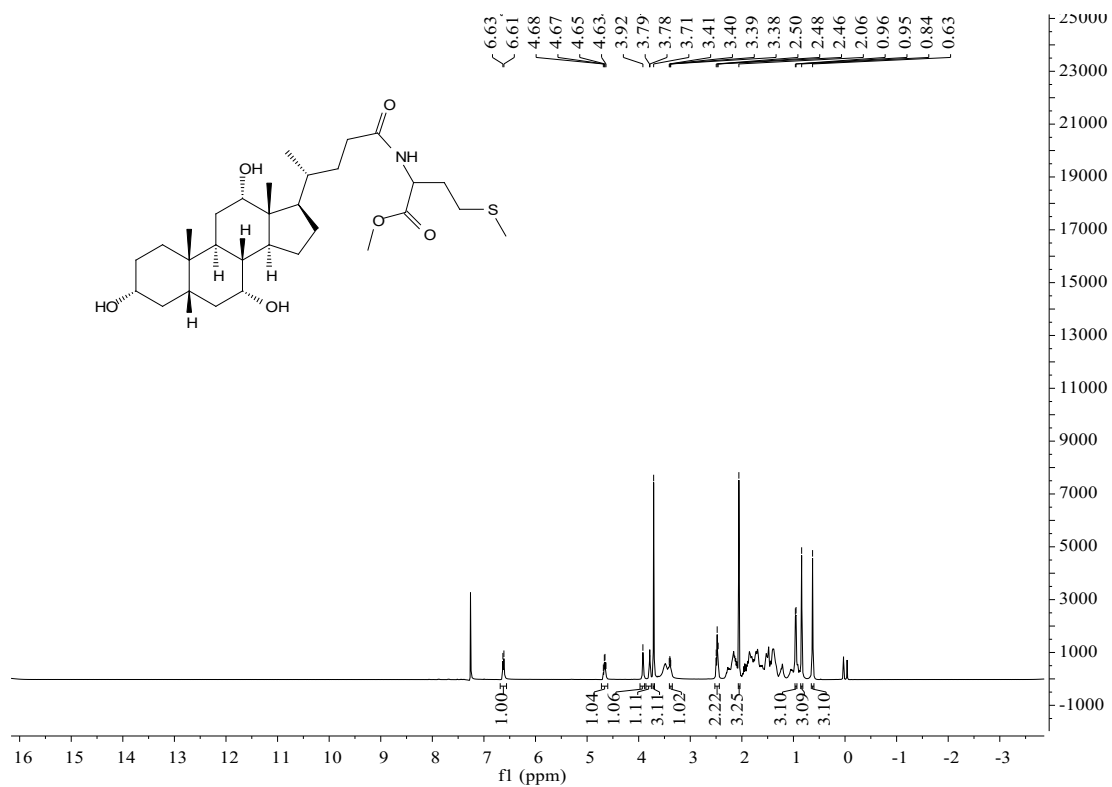



# Compound 9

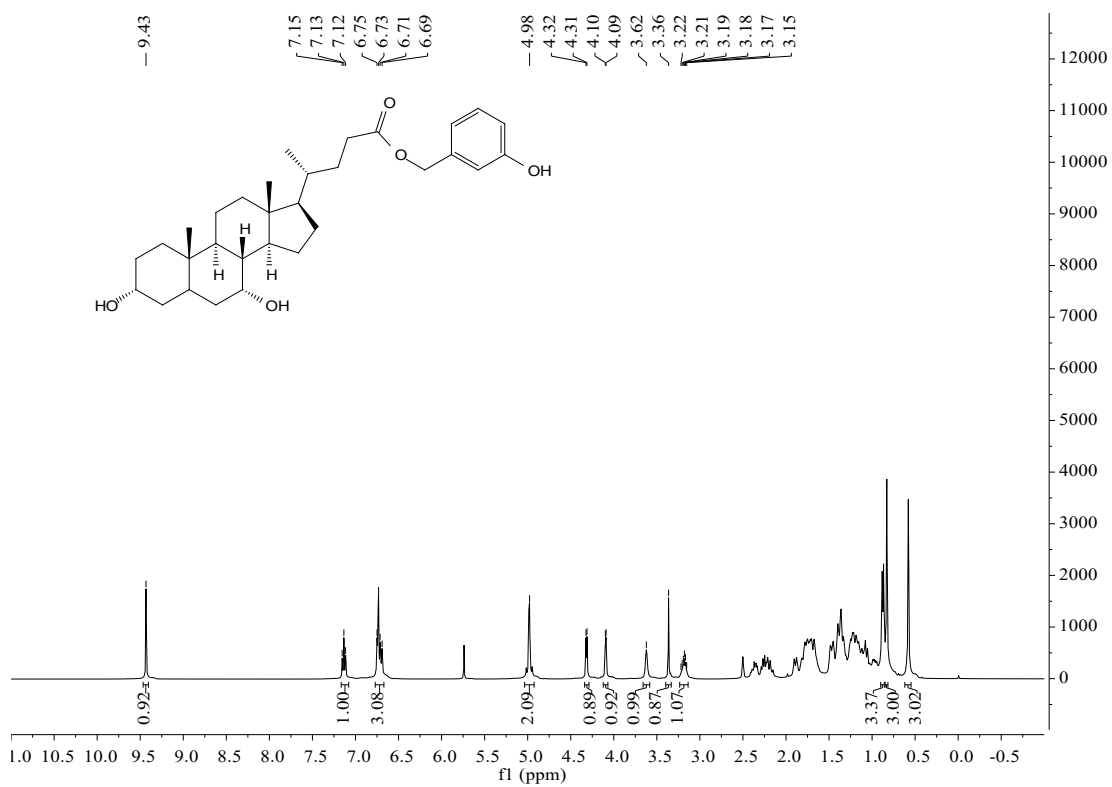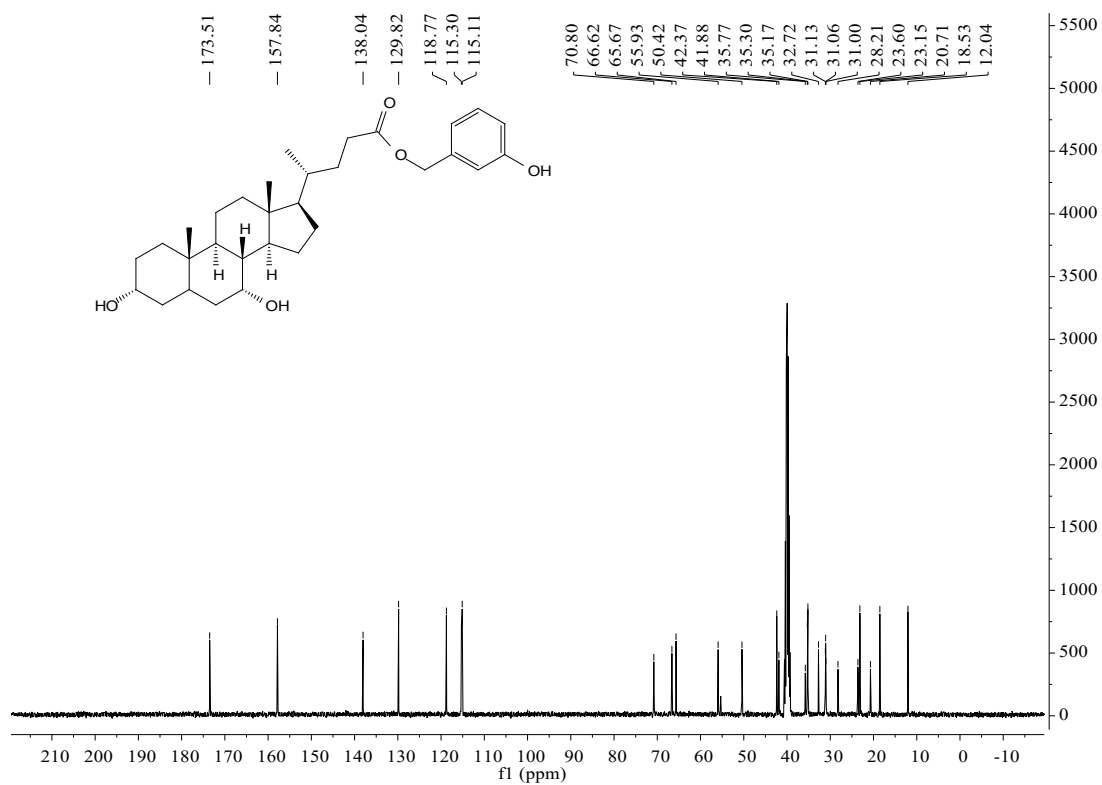



# Compound 11

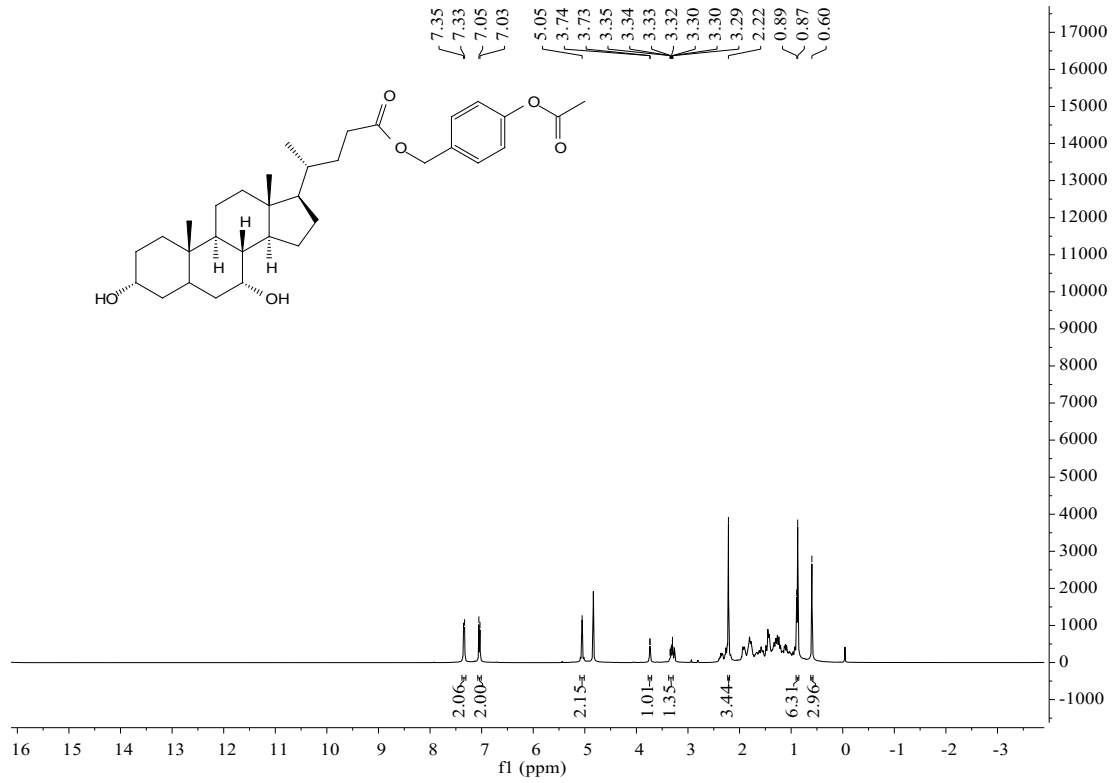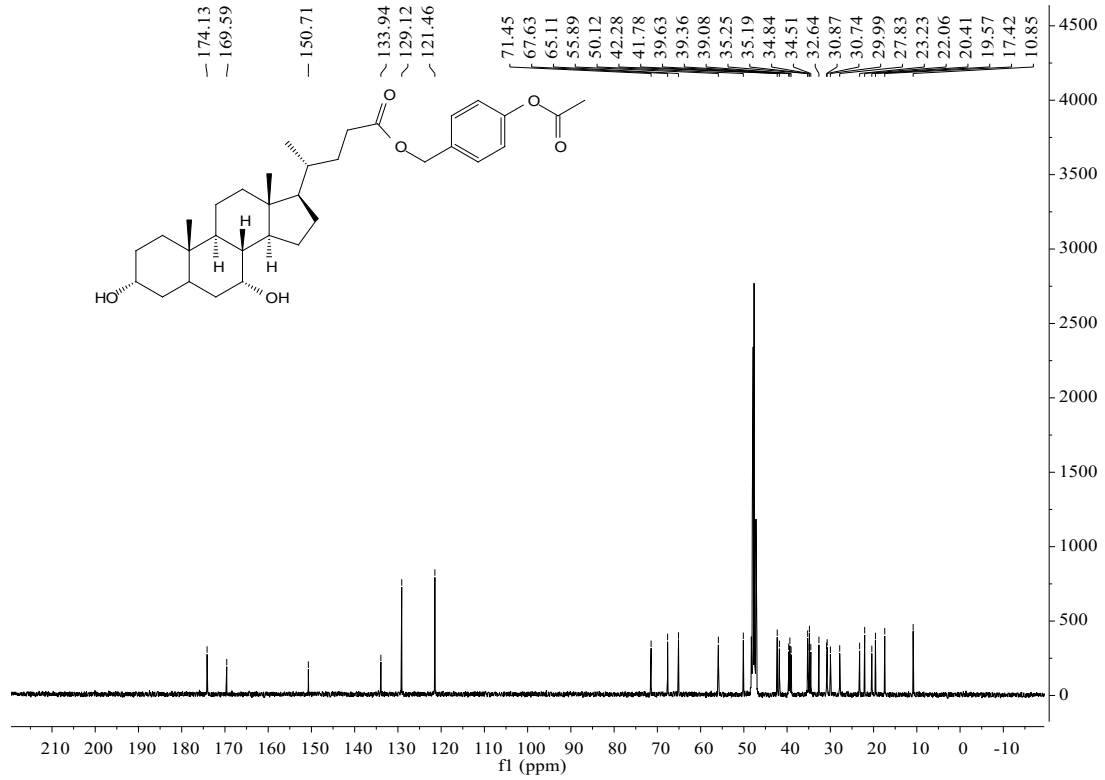

# Compound 12

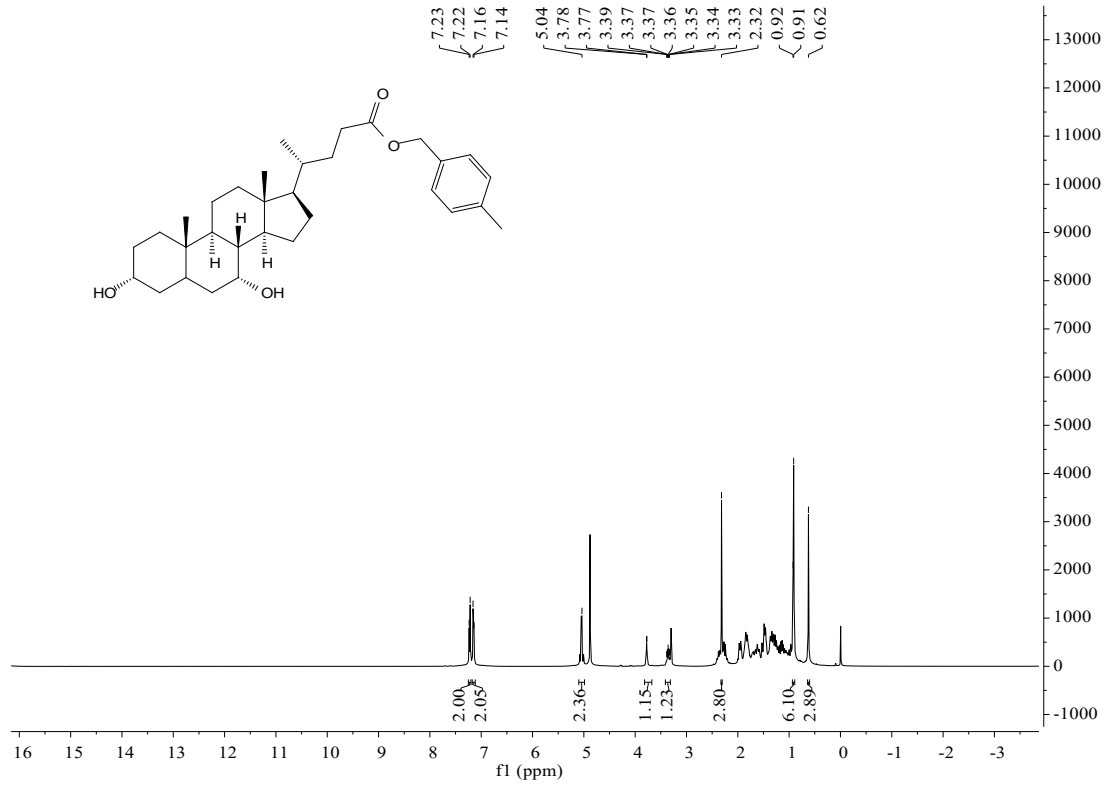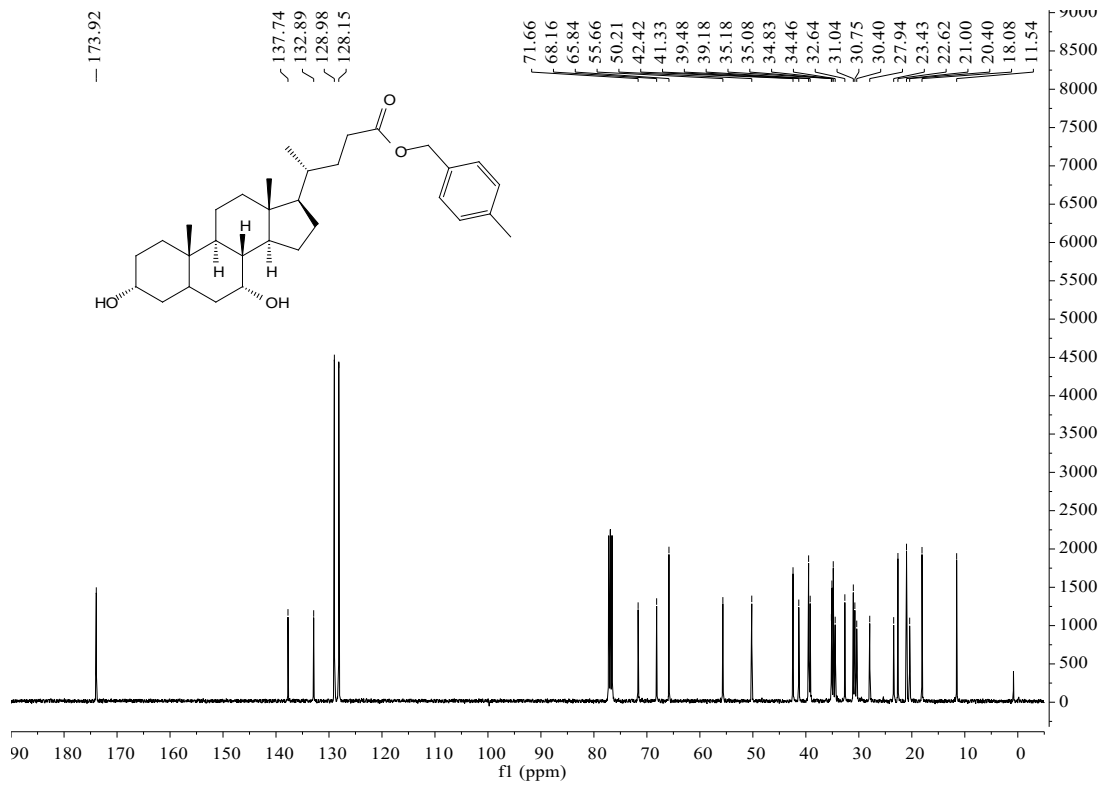

# Compound 13

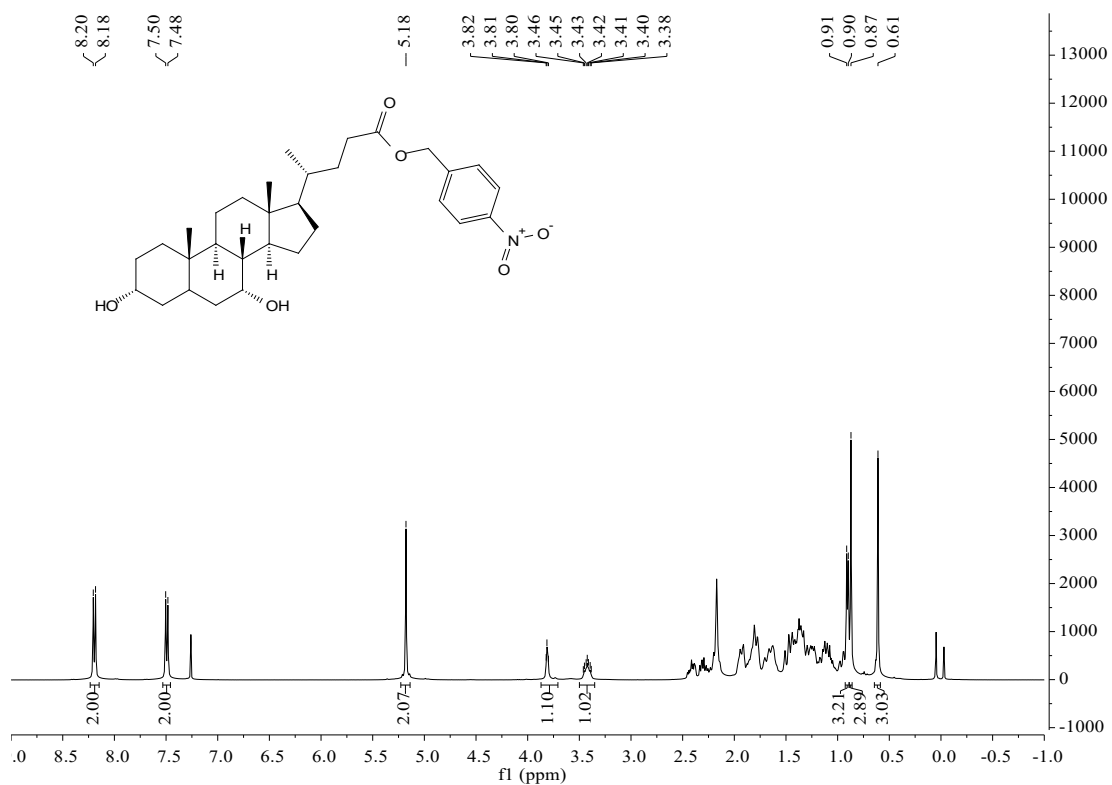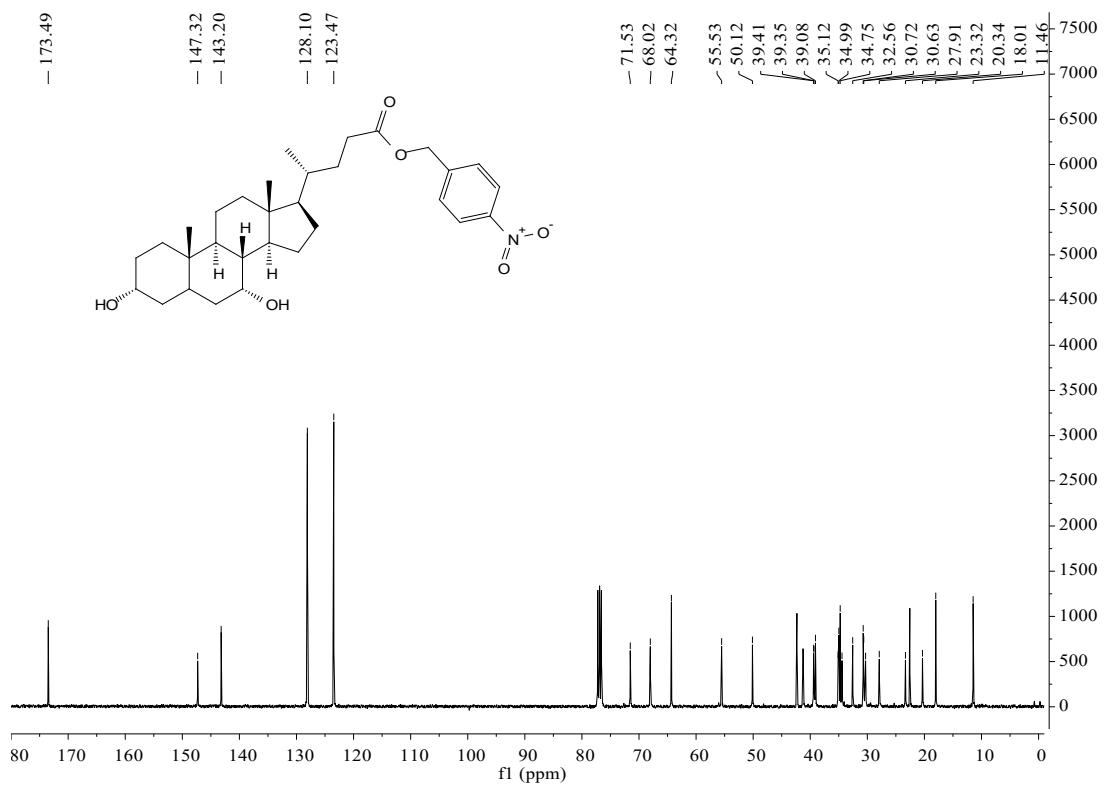

# Compound 14

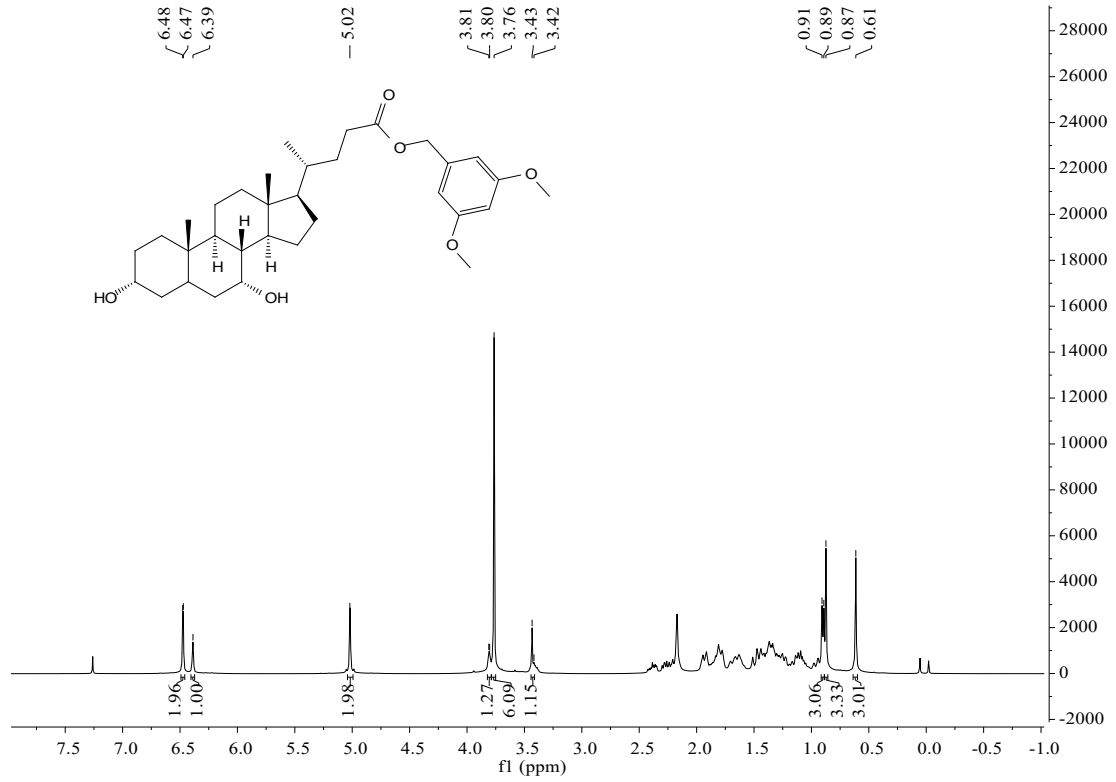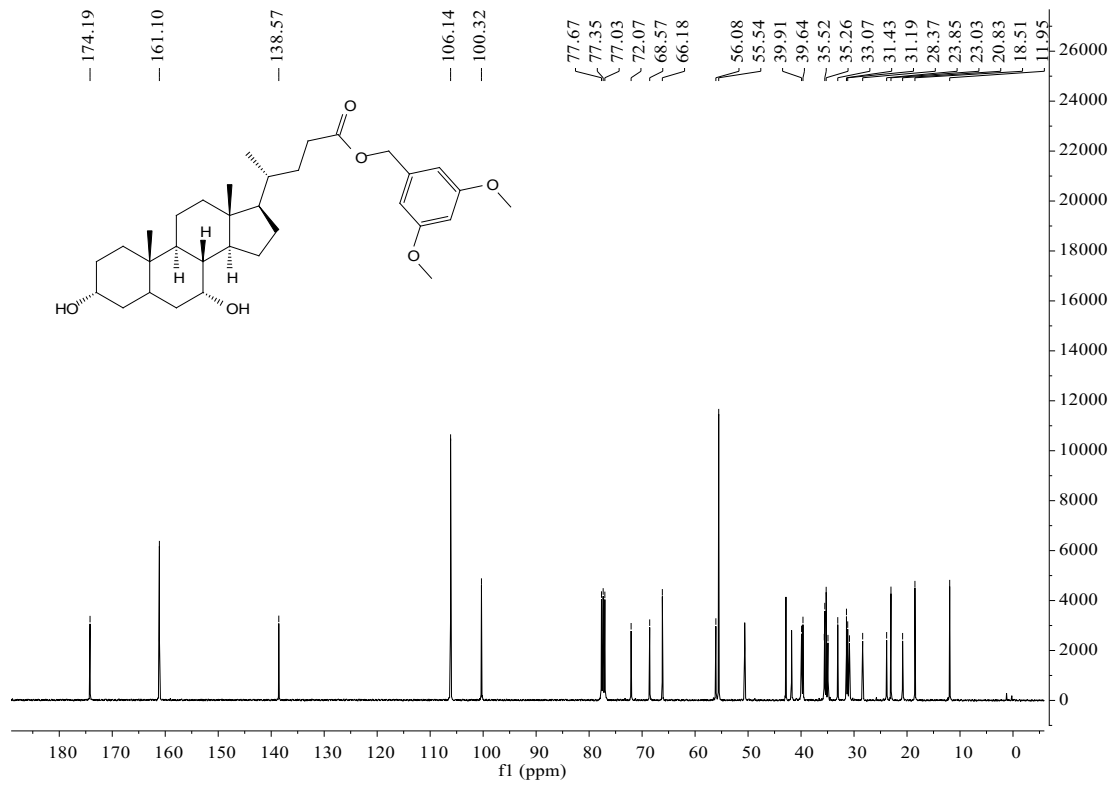

# Compound 15

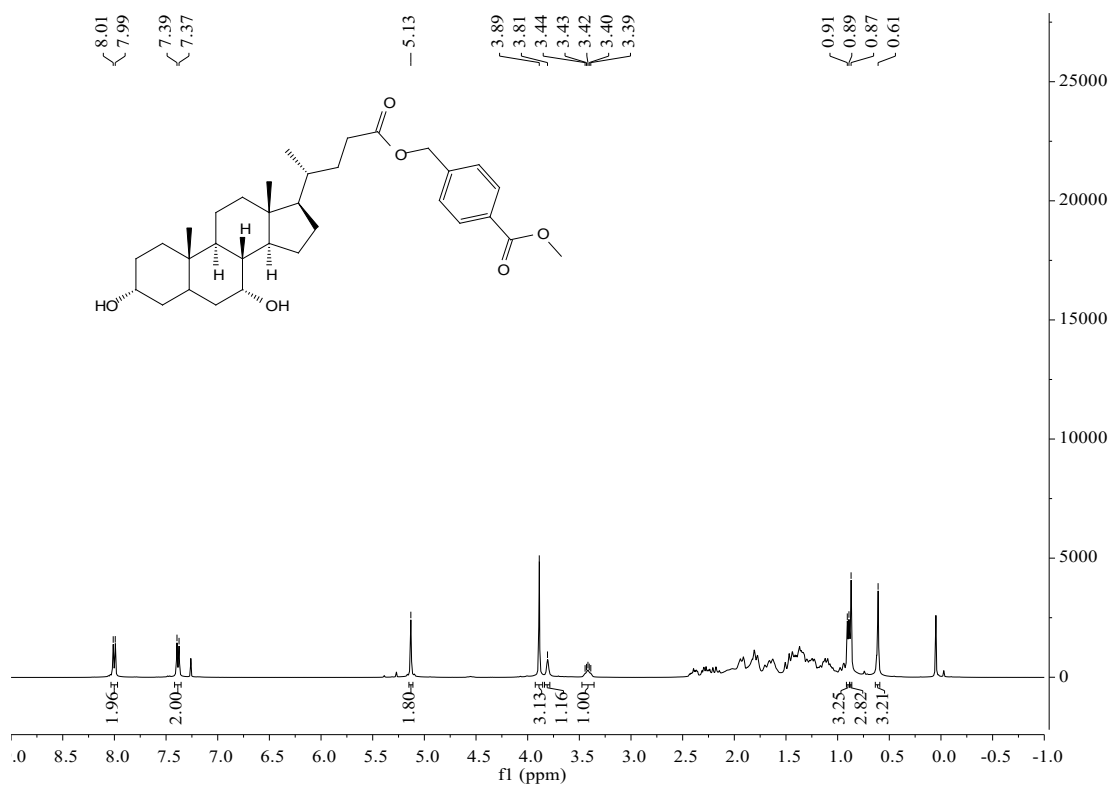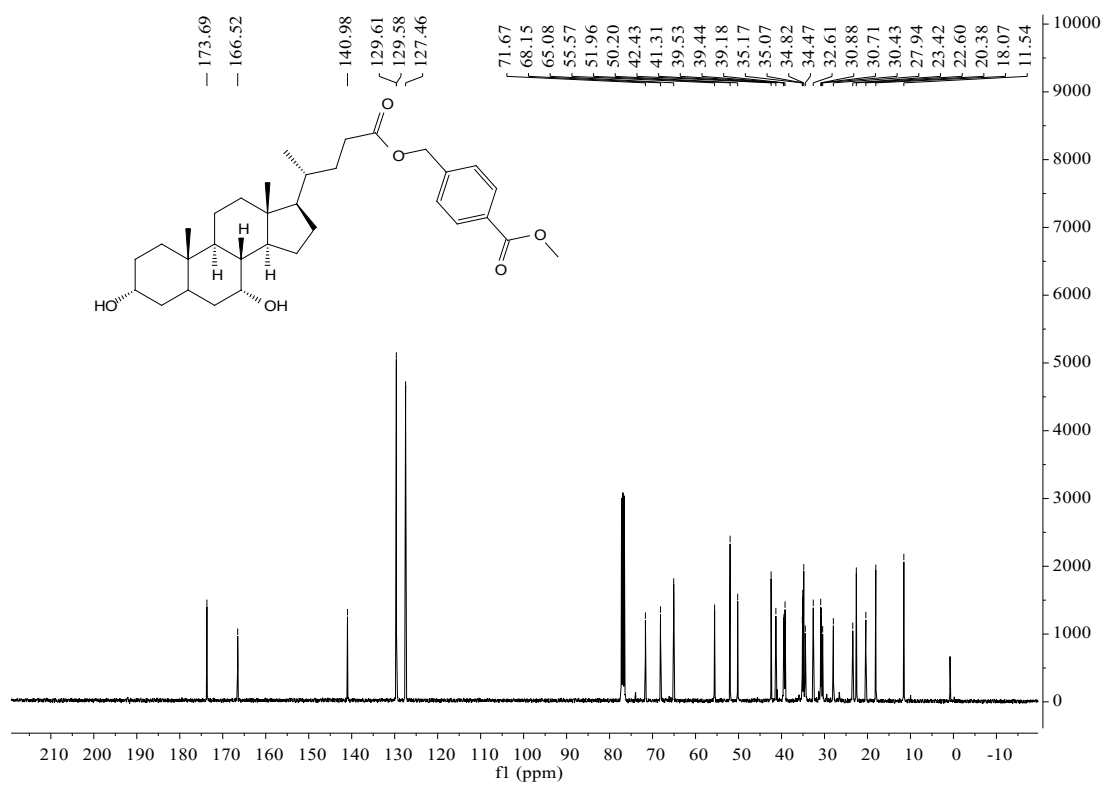

# Compound 16

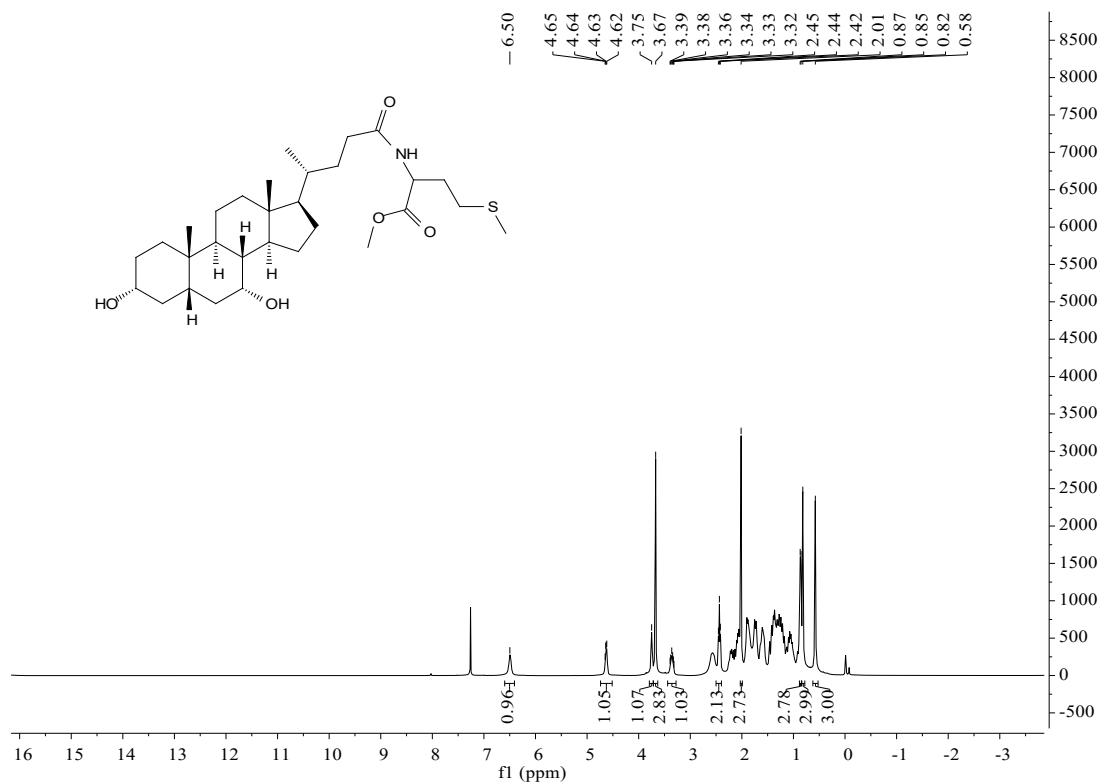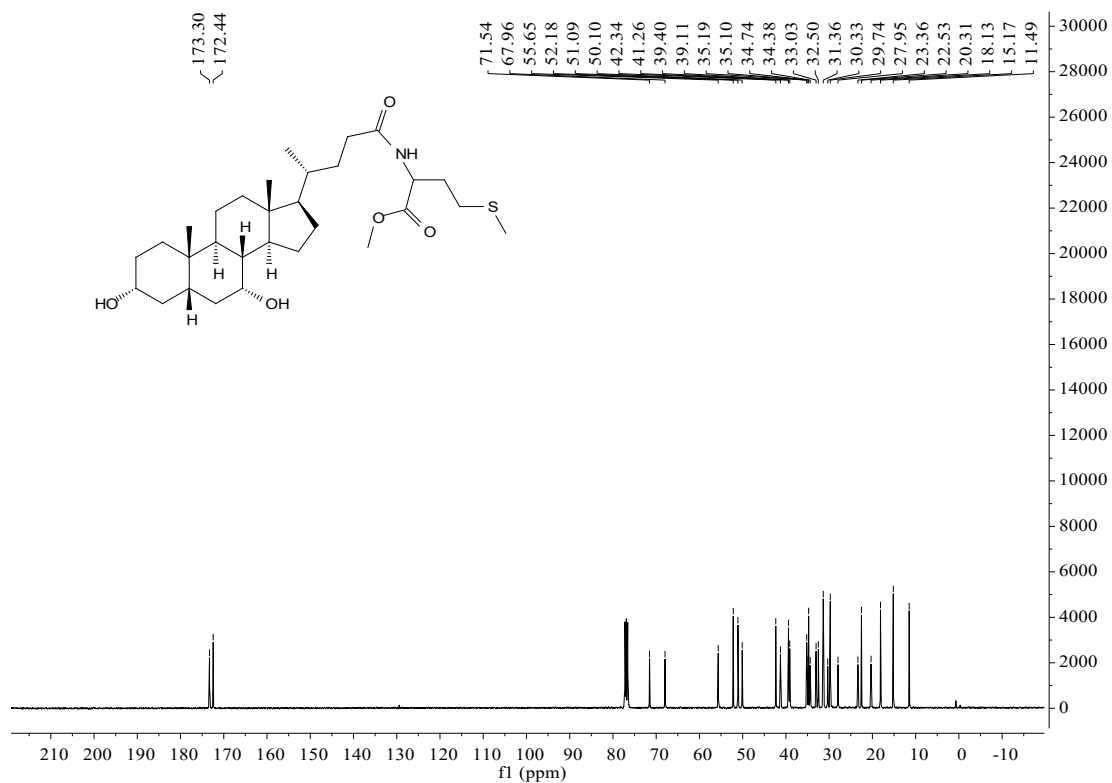



# Compound 17

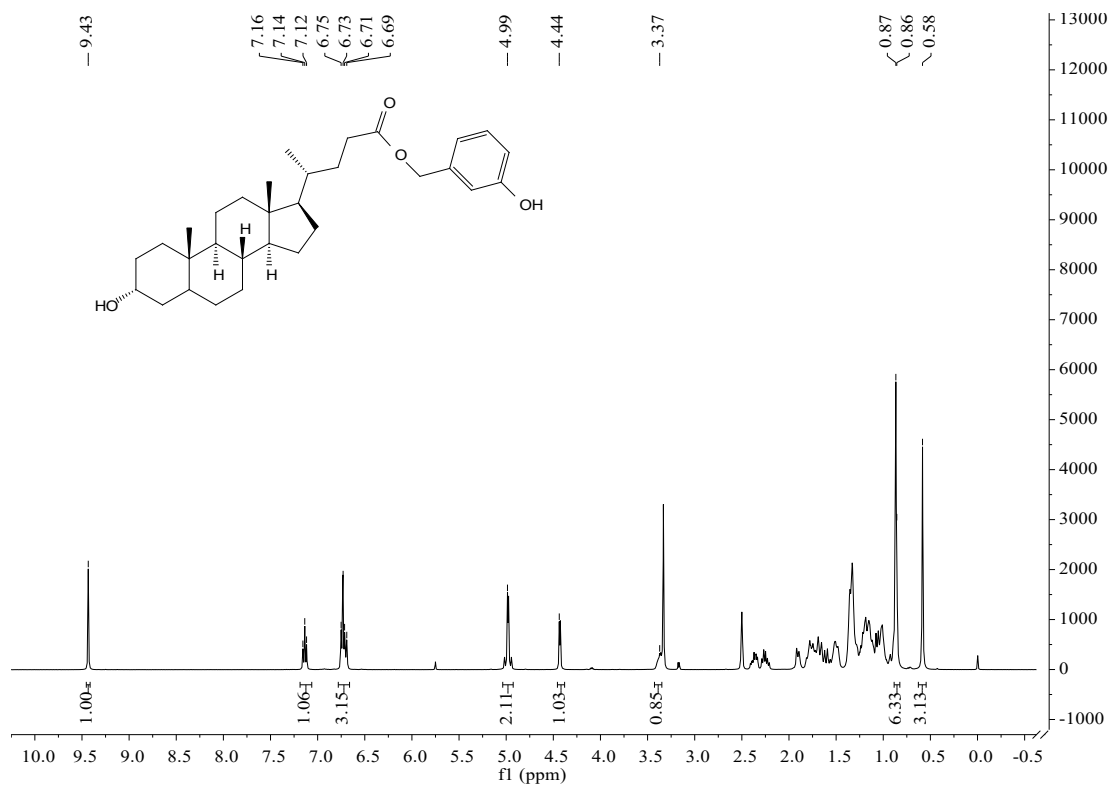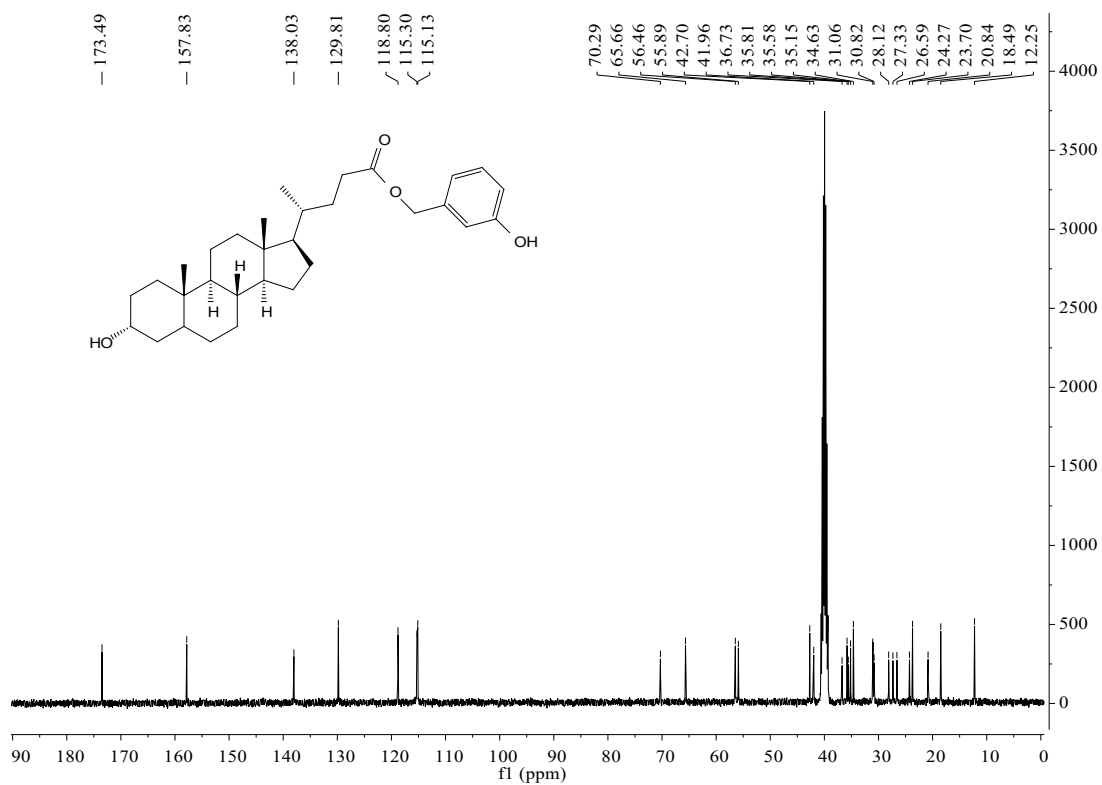

# Compound 18

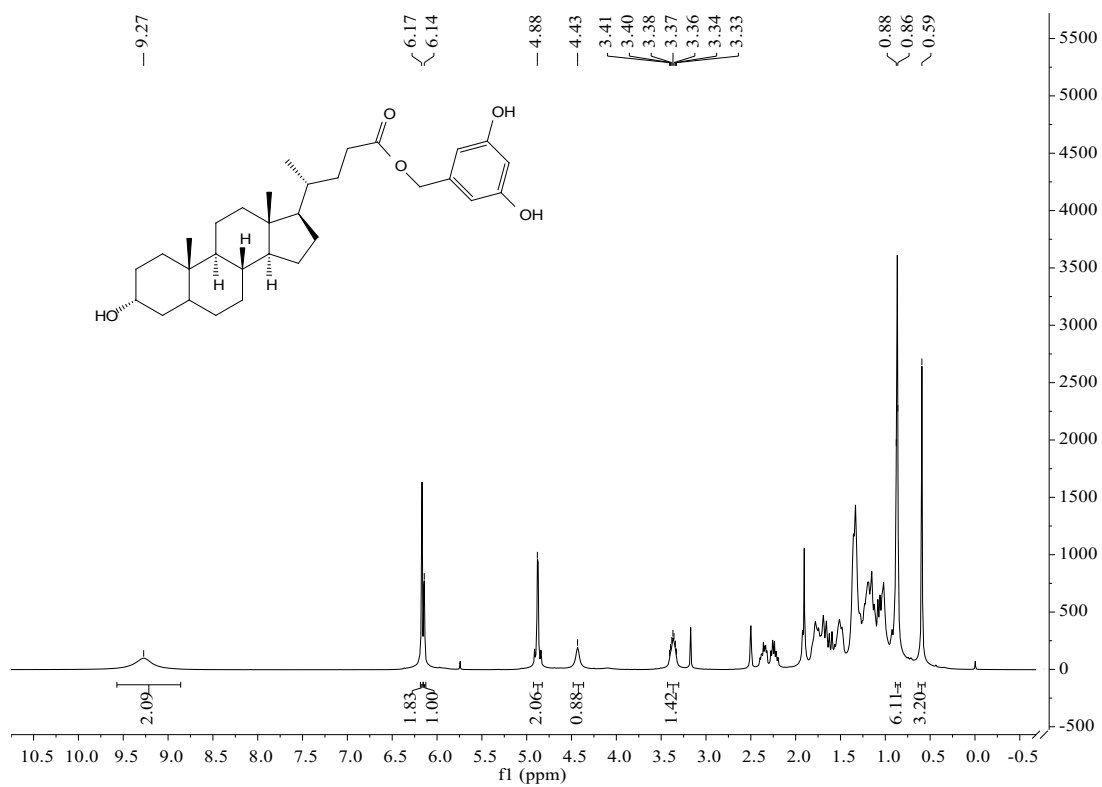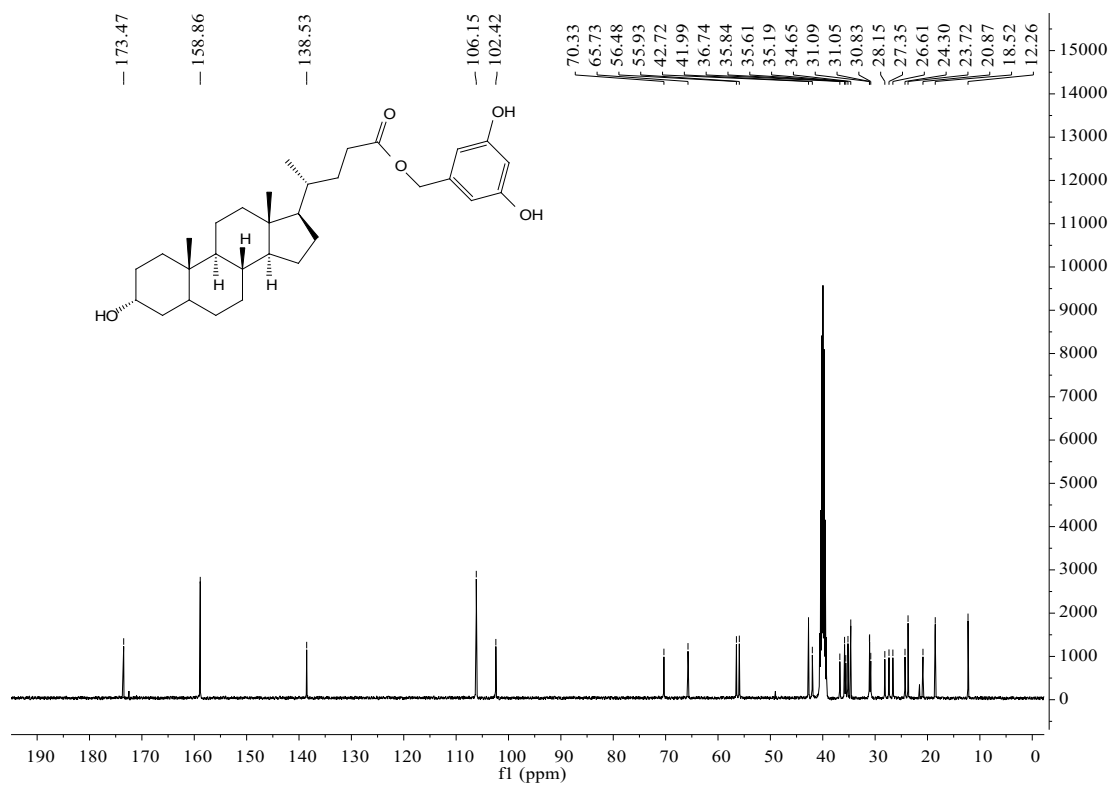

# Compound 19

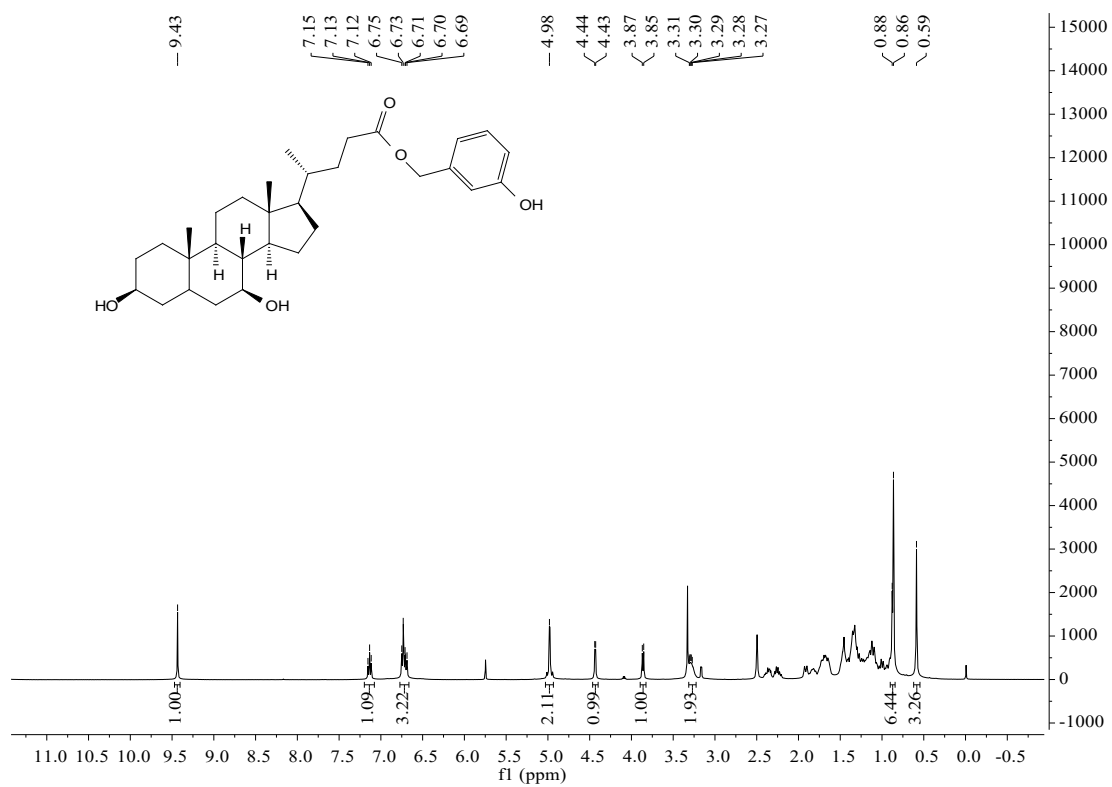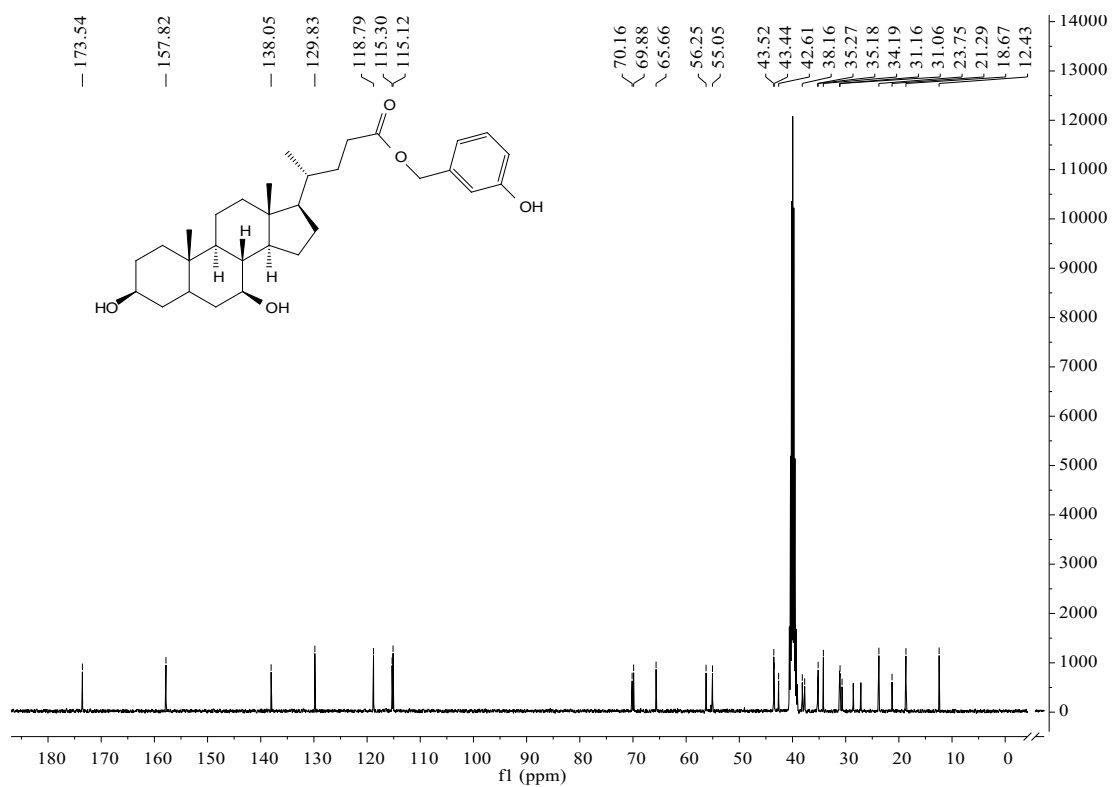

# Compound 20

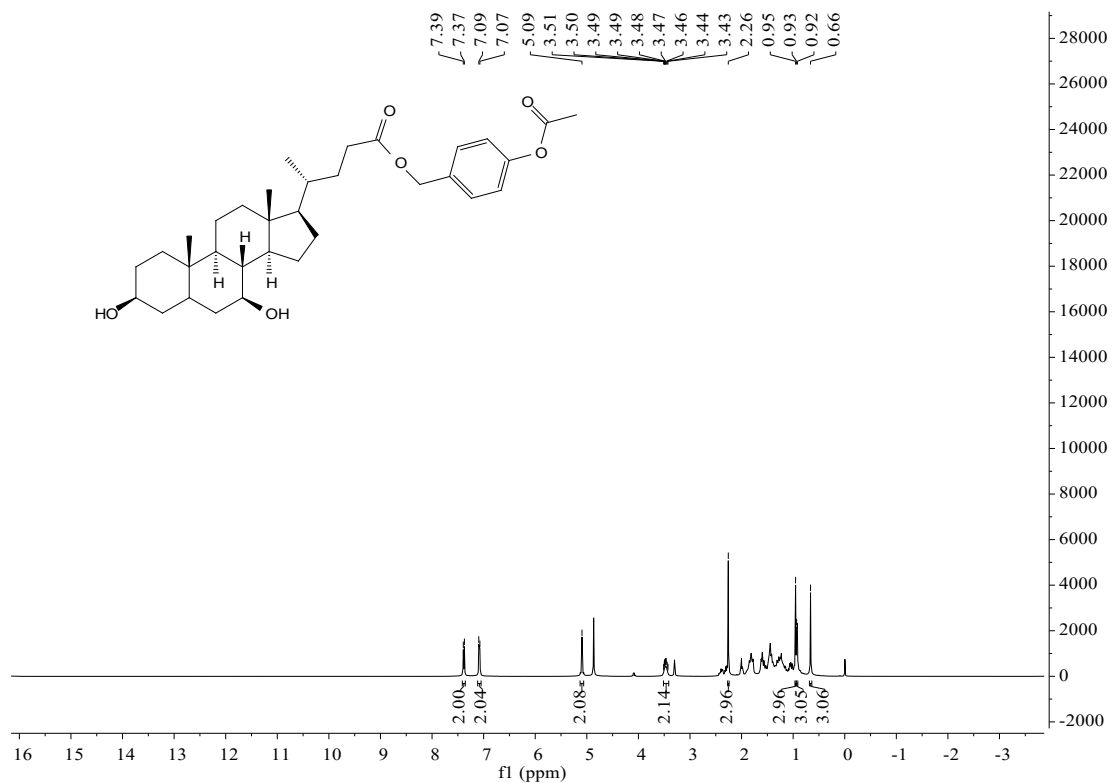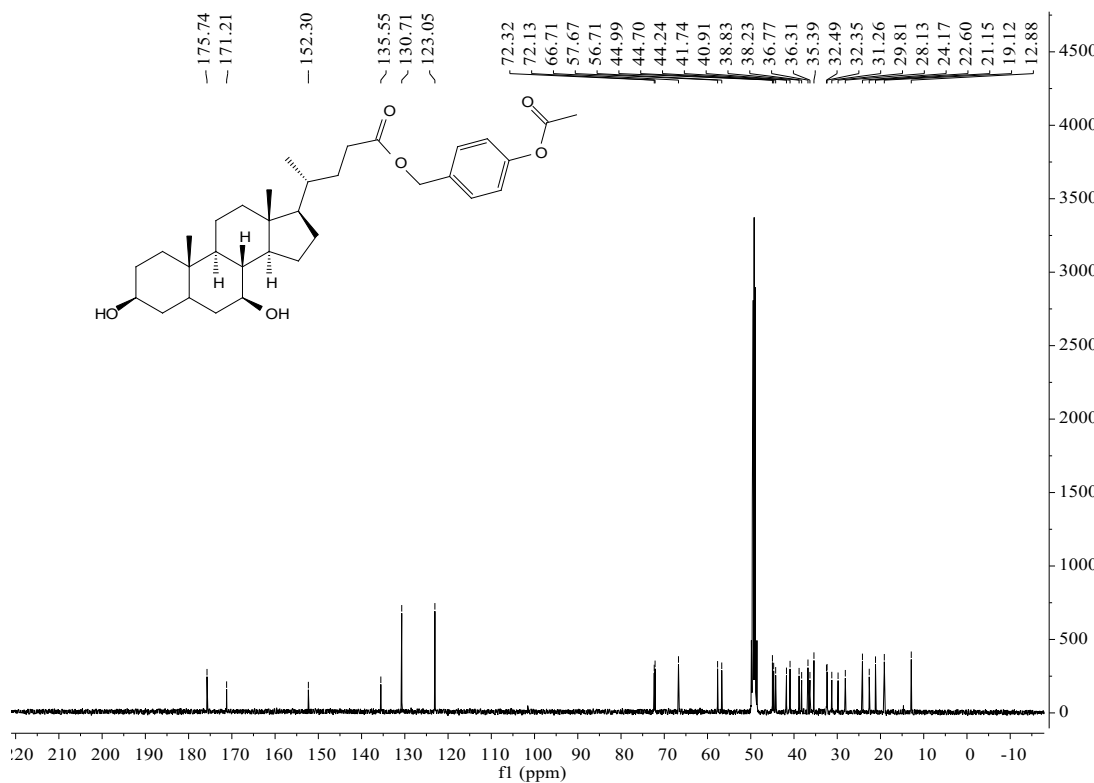

Supplement: d2md00220e1.pdf [file d2md00220e1.pdf]
